# Supplementary material for: Solar light-driven photoelectrocatalytic and photocatalytic applications based on flower-like NV-g-C3N5@VS2 heterojunctions
Source: Royal Society of Chemistry journal article supplement (doi:10.1039/d3nj00391d), 2023-01-01
Supplement: d3nj00391d1.pdf [file d3nj00391d1.pdf]

## **Solar Light Motivated Photoelectrocatalytic and Photocatalytic Applications Based on Flower-like NV-g-C<sub>3</sub>N<sub>5</sub>@VS<sub>2</sub> Heterojunction**

Bicheng Hu<sup>a</sup>, **Yuhui Zhang**<sup>a</sup>, Jincheng Zhang<sup>a</sup>, Jiazan Liu<sup>a</sup>, Meng Lei<sup>a</sup>, Chenxi Zhao<sup>a</sup>,

QiuJun Lu<sup>a</sup>, Haiyan Wang<sup>a\*</sup>, Fuyou Du<sup>a\*</sup> and Shiyong Zhang<sup>b\*</sup>

<sup>a</sup> *College of Biological and Chemical Engineering, Changsha University, Changsha,  
410022, Hunan Province, China*

<sup>b</sup> *Hunan Key Laboratory of Applied Environmental Photocatalysis, Changsha  
University, Changsha, 410022, Hunan Province, China*

<sup>c</sup> *Hunan Engineering Research Center of Degradable Materials and Molding  
Technology, Changsha University, Changsha, 410022, Hunan Province, China*

\* Corresponding author; Tel: +86-84261506; Fax: +86-731-84261382;

E-mail address: wanghaiyan@ccsu.edu.cn (Haiyan Wang), dufu2005@126.com (Fuyou Du),

cdzhangshiyong@163.com (Shiyong Zhang)

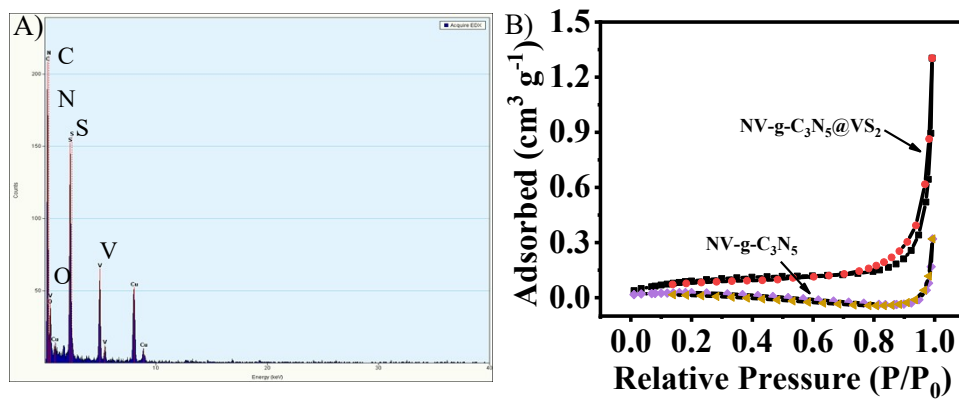

**Fig. S1** (A) EDX image of NV-g-C<sub>3</sub>N<sub>5</sub>@VS<sub>2</sub> heterojunction; (B) N<sub>2</sub> adsorption and desorption isotherm curves of NV-g-C<sub>3</sub>N<sub>5</sub> and NV-g-C<sub>3</sub>N<sub>5</sub>@VS<sub>2</sub> heterojunction.

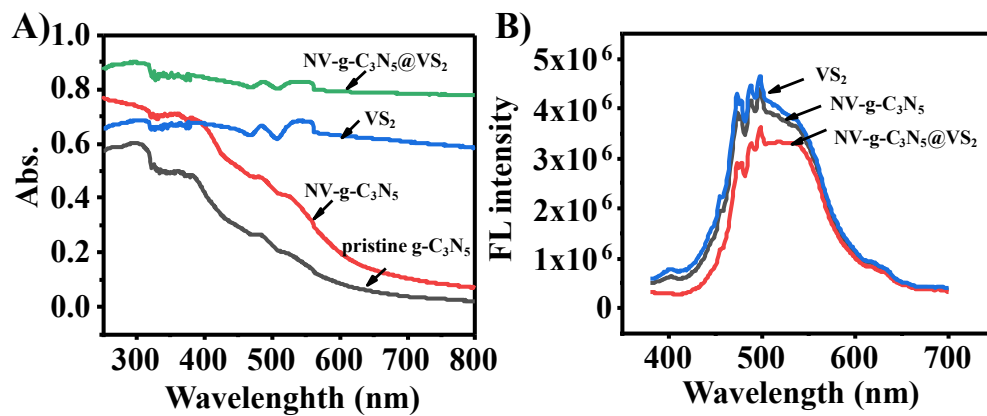

**Fig. S2** (A) UV-vis DRS spectra of VS<sub>2</sub>, NV-g-C<sub>3</sub>N<sub>5</sub>, g-C<sub>3</sub>N<sub>5</sub> and NV-g-C<sub>3</sub>N<sub>5</sub>@VS<sub>2</sub> heterojunction. (B) Solid-state fluorescence spectra of VS<sub>2</sub>, NV-g-C<sub>3</sub>N<sub>5</sub>, NV-g-C<sub>3</sub>N<sub>5</sub>@VS<sub>2</sub>.

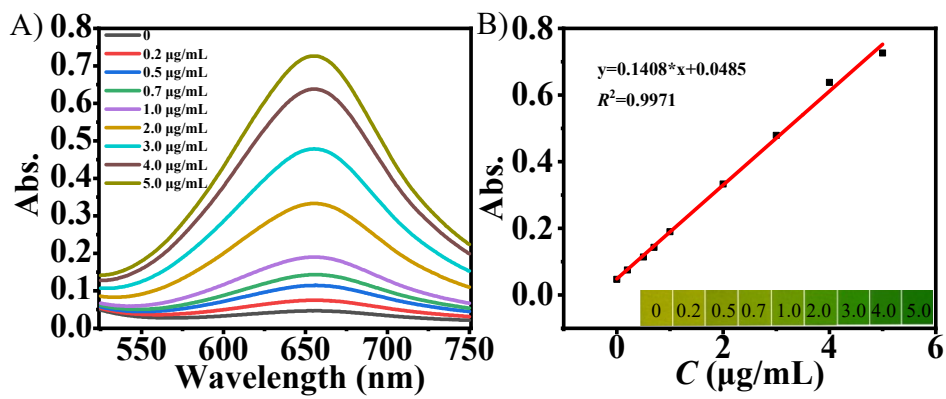

**Fig. S3** (A) UV-Vis absorption spectra of  $\text{NH}_4^+$  treated with indoxyl blue at room temperature for 2 h. (B) The linear relationship between the standard concentration of  $\text{NH}_4^+$  and the absorbance at 650 nm.

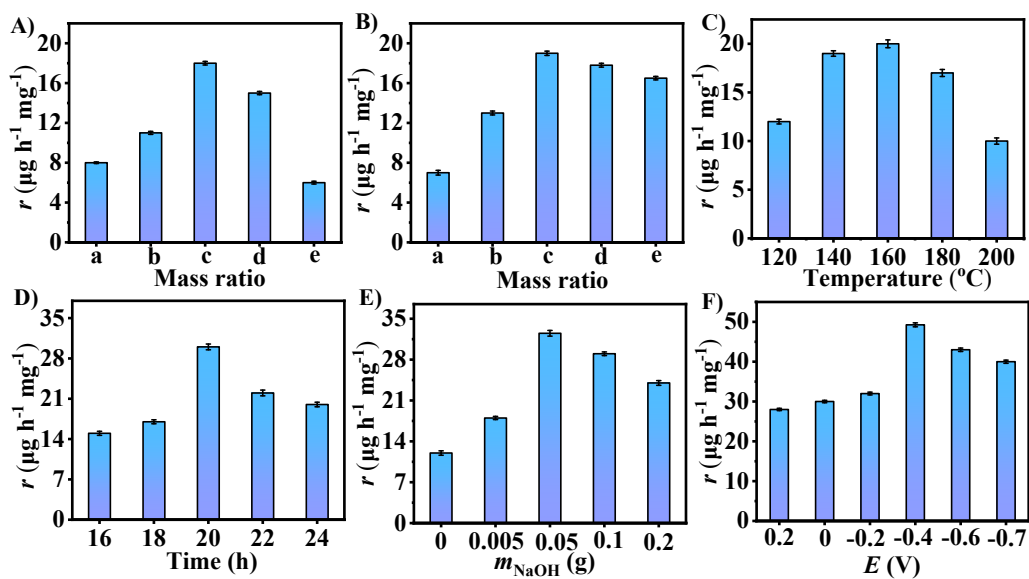

**Fig. S4** (A) Ammonia yields of NV-g-C<sub>3</sub>N<sub>5</sub>@VS<sub>2</sub> heterojunctions synthesized by different mass ratio of NV-g-C<sub>3</sub>N<sub>5</sub>, ammonium metavanadate and thioacetamide. a, b, c, d and e represent 0.4:0.2:0.8, 0.2:0.2:0.8, 0.1:0.2:0.8, 0.05:0.2:0.8 and 0.04:0.2:0.8, respectively. (B) Ammonia yields of NV-g-C<sub>3</sub>N<sub>5</sub>@VS<sub>2</sub> heterojunctions synthesized by different mass ratio of NV-g-C<sub>3</sub>N<sub>5</sub>, ammonium metavanadate and thioacetamide. a, b, c, d and e represent 0.1:0.2:0.2, 0.1:0.2:0.4, 0.1:0.2:0.6, 0.1:0.2:0.8 and 0.1:0.2:1.0, respectively. (C) Ammonia yields of NV-g-C<sub>3</sub>N<sub>5</sub>@VS<sub>2</sub> heterojunctions synthesized by different hydrothermal temperature. (D) Ammonia yields of NV-g-C<sub>3</sub>N<sub>5</sub>@VS<sub>2</sub> heterojunctions synthesized by different hydrothermal time. (E) Ammonia yields of NV-g-C<sub>3</sub>N<sub>5</sub>@VS<sub>2</sub> heterojunctions synthesized by NV-g-C<sub>3</sub>N<sub>5</sub> treated with different NaOH (0, 0.005, 0.05, 0.1, 0.2, 0.3 g). (F) Ammonia production rates of NV-g-C<sub>3</sub>N<sub>5</sub>@VS<sub>2</sub> heterojunctions catalyzed at different applied voltages for 1 h.

**Tab. S1** Comparison of photoelectric catalytic nitrogen reduction with different materials.

| Material                                            | electrolyte solution                                                          | Ammonia production rate ( $\mu\text{g h}^{-1} \text{mg}^{-1}$ ) | References |
|-----------------------------------------------------|-------------------------------------------------------------------------------|-----------------------------------------------------------------|------------|
| NV-g-C <sub>3</sub> N <sub>5</sub> /BiOBr           | 0.05 M HCl+0.05 M Na <sub>2</sub> SO <sub>4</sub>                             | 29.4                                                            | 1          |
| N-NiO/CC                                            | 0.1 M LiClO <sub>4</sub> at -0.5 V                                            | 22.7                                                            | 2          |
| Au NPs-PTFE                                         | 0.05 M H <sub>2</sub> SO <sub>4</sub> +0.05 M Na <sub>2</sub> SO <sub>3</sub> | 18.9                                                            | 3          |
| g-C <sub>3</sub> N <sub>4</sub> /ZnMoCdS            | 0.1 M KCl                                                                     | 2.5                                                             | 4          |
| Au/TiO <sub>2</sub>                                 | 0.1 M HCl at -0.40 V                                                          | 34.1                                                            | 5          |
| NV-g-C <sub>3</sub> N <sub>5</sub> /VS <sub>2</sub> | 0.1 M Na <sub>2</sub> SO <sub>4</sub>                                         | 49.26                                                           | This work  |

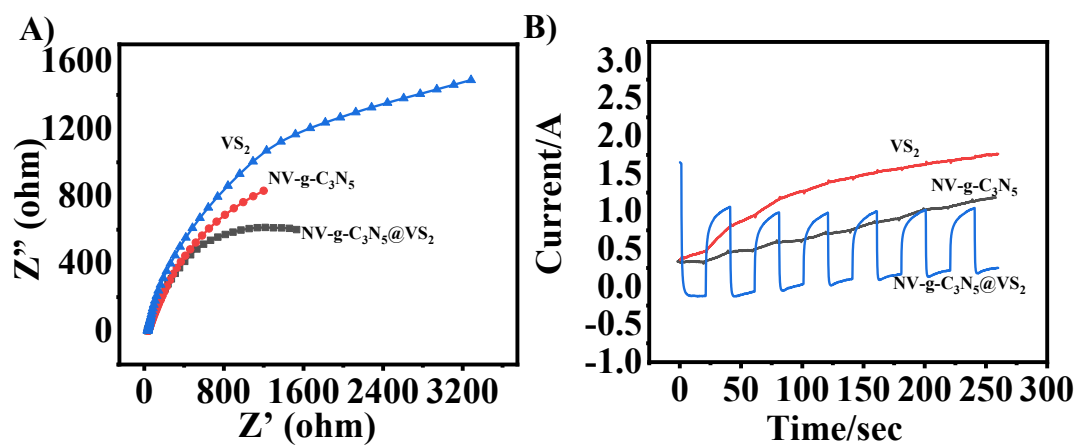

**Fig. S5** (A) The electrochemical impedance spectroscopy (EIS) results and (B) photocurrent responses of  $NV-C_3N_5$ ,  $VS_2$  and  $NV-g-C_3N_5@VS_2$  heterojunction under visible light irradiation, respectively.

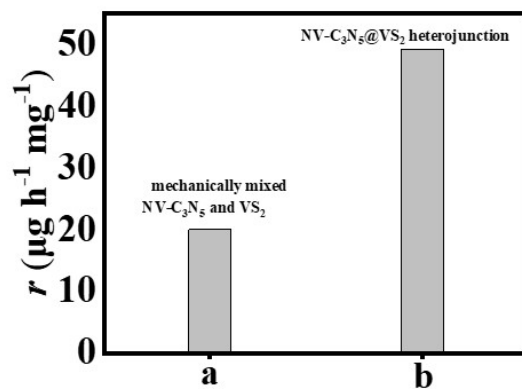

**Fig. S6** The productive rate of ammonia of the mechanically mixed NV-C<sub>3</sub>N<sub>5</sub> and VS<sub>2</sub> (a), and NV-g-C<sub>3</sub>N<sub>5</sub>@VS<sub>2</sub> heterojunction (b) in 0.1 M Na<sub>2</sub>SO<sub>4</sub> solution filled N<sub>2</sub> with the bias voltage of -0.4 V under visible light.



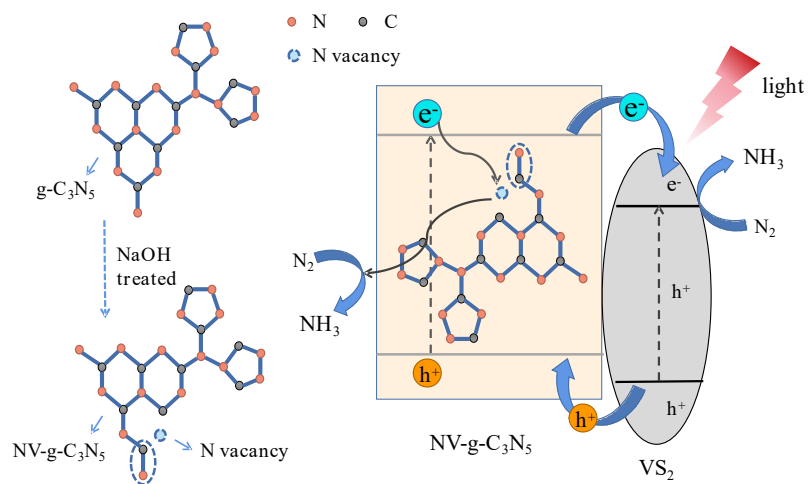

**Fig. S7** Schematic illustration of the preparation of NV-g-C<sub>3</sub>N<sub>5</sub> and the photoelectric catalytic nitrogen reduction reaction of NV-g-C<sub>3</sub>N<sub>5</sub>@VS<sub>2</sub> heterojunction.

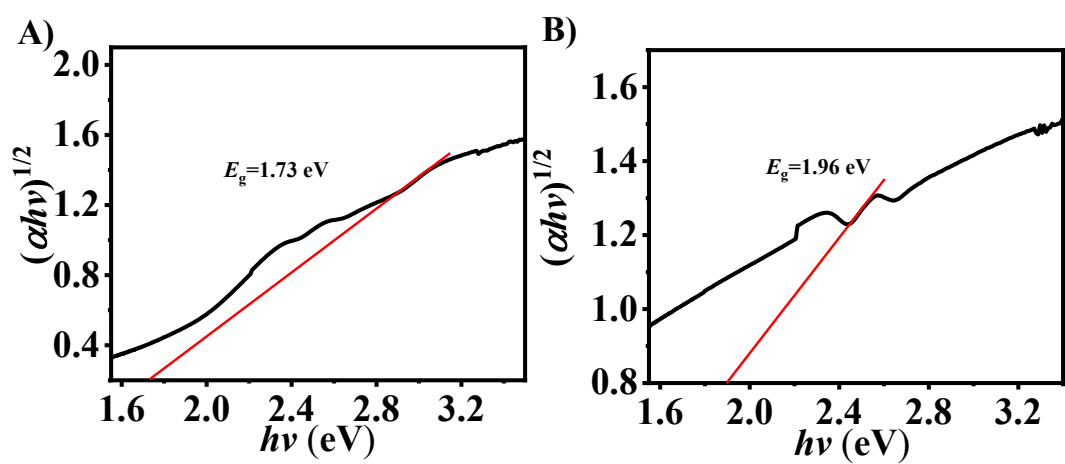

**Fig. S8** Plots of transformed Kubelka–Munk function versus photon energy of (A) NV-g-C<sub>3</sub>N<sub>5</sub> and (B) VS<sub>2</sub>.

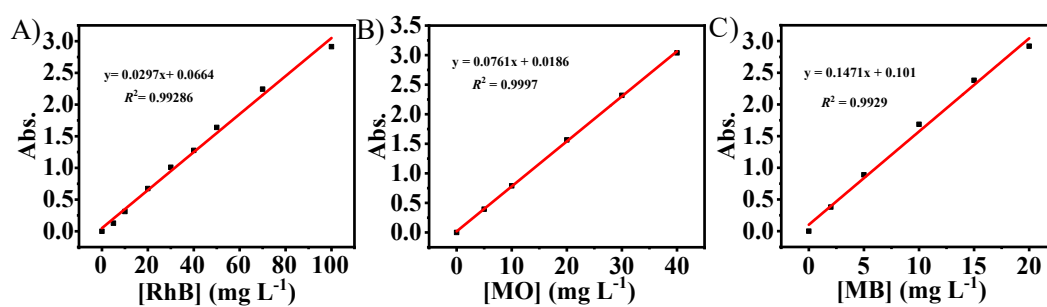

**Fig. S9** The linear relationships between the absorbance and the standard concentration of RhB

MB and MO, respectively.

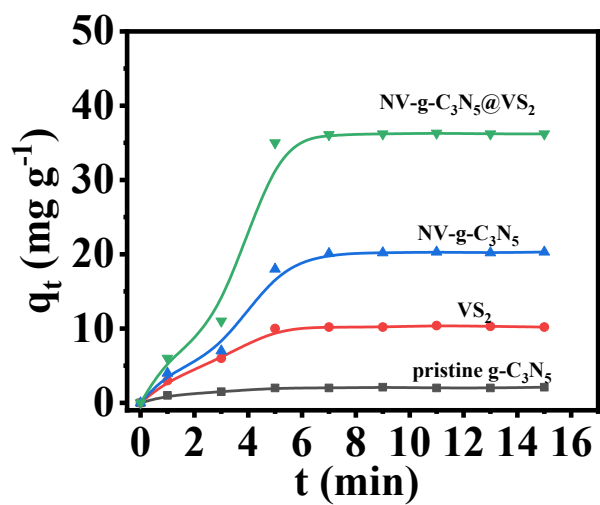

**Fig. S10** The maximum adsorption capacity of pristine g-C<sub>3</sub>N<sub>5</sub>, NV-g-C<sub>3</sub>N<sub>5</sub>, VS<sub>2</sub> and NV-g-C<sub>3</sub>N<sub>5</sub>@VS<sub>2</sub> heterojunction.

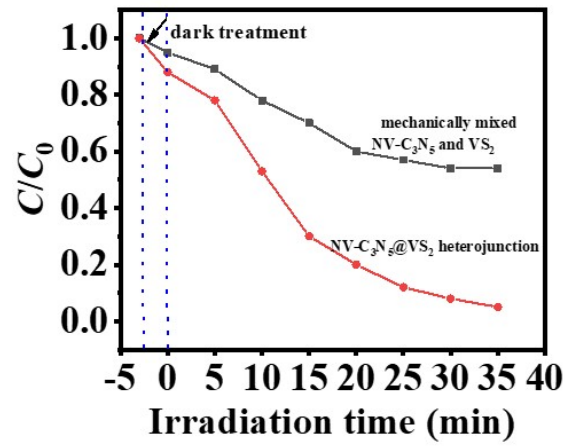

**Fig. S11** The changes ratio Rhodamine concentration with irradiation time over the mechanically mixed NV-C<sub>3</sub>N<sub>5</sub> and VS<sub>2</sub> (a), and NV-g-C<sub>3</sub>N<sub>5</sub>@VS<sub>2</sub> heterojunction under visible light irradiation.

$C_0=40 \text{ mg L}^{-1}$ .

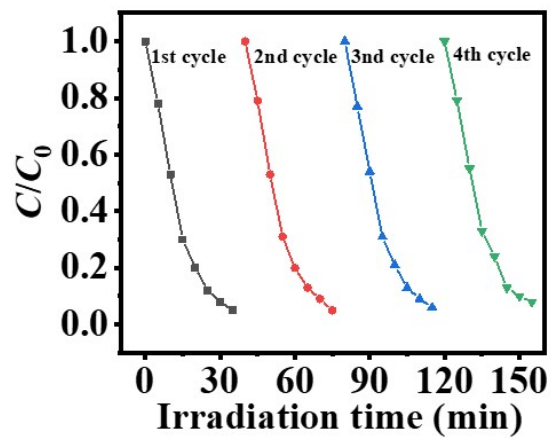

**Fig. S12** Recyclability of the visible photocatalytic decomposition of MB by NV-g-C<sub>3</sub>N<sub>5</sub>@VS<sub>2</sub>

heterojunction.  $C_0$  is the initial concentration of RB.  $C$  is the remaining concentration of RB.

$C_0=40 \text{ mg L}^{-1}$ .

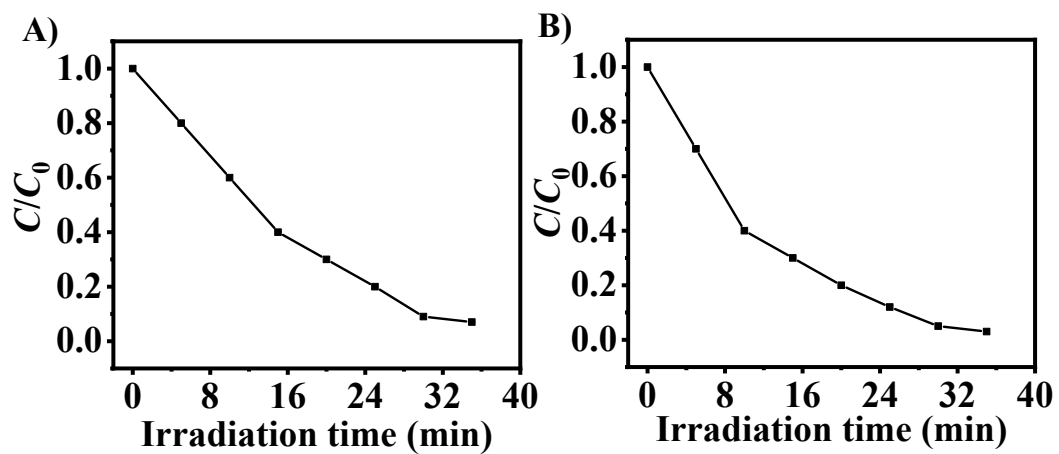

**Fig. S13** The change ratio (A) MO and (B) MB concentration with irradiation time over NV-g- $C_3N_5@VS_2$  heterojunction under visible light irradiation.  $C_0=40 \text{ mg L}^{-1}$ .  $C_0$  and  $C$  are the original and the remaining concentration of pollution (MO and MB), respectively.

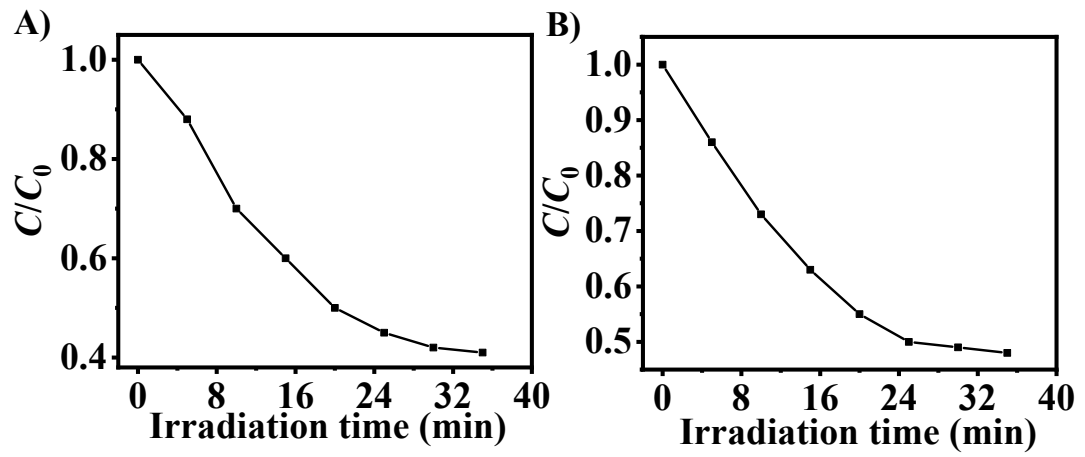

**Fig. S14** The changes ratio RB concentration with (A) p-benzoquinone and (B) dimethyl sulfoxide over NV-g-C<sub>3</sub>N<sub>5</sub>@VS<sub>2</sub> heterojunction under visible light irradiation.



## Reference

1. Li, M.; Lu, Q.; Liu, M.; Yin, P.; Wu, C.; Li, H.; Zhang, Y.; Yao, S., Photoinduced charge separation via the double-electron transfer mechanism in nitrogen vacancies g-C<sub>3</sub>N<sub>5</sub>/BiOBr for the photoelectrochemical nitrogen reduction. *ACS Appl. Mater. Inter.* **2020**, *12* (34), 38266-38274.
2. Wang, X.-h.; Wang, J.; Li, Y.-b.; Chu, K., Nitrogen-doped NiO nanosheet array for boosted electrocatalytic N<sub>2</sub> reduction. *ChemCatChem* **2019**, *11* (18), 4529-4536.
3. Zheng, J.; Lyu, Y.; Qiao, M.; Wang, R.; Zhou, Y.; Li, H.; Chen, C.; Li, Y.; Zhou, H.; Jiang, S. P.; Wang, S., Photoelectrochemical synthesis of ammonia on the aerophilic-hydrophilic heterostructure with 37.8% efficiency. *Chem.* **2019**, *5* (3), 617-633.
4. Zhang, Q.; Hu, S.; Fan, Z.; Liu, D.; Zhao, Y.; Ma, H.; Li, F., Preparation of g-C<sub>3</sub>N<sub>4</sub>/ZnMoCdS hybrid heterojunction catalyst with outstanding nitrogen photofixation performance under visible light via hydrothermal post-treatment. *Dalton T.* **2016**, *45* (8), 3497-3505.
5. Zhao, S.; Liu, H.-X.; Qiu, Y.; Liu, S.-Q.; Diao, J.-X.; Chang, C.-R.; Si, R.; Guo, X.-H., An oxygen vacancy-rich two-dimensional Au/TiO<sub>2</sub> hybrid for synergistically enhanced electrochemical N<sub>2</sub> activation and reduction. *J. Mater. Chem. A* **2020**, *8* (14), 6586-6596.
